# Supplementary material for: Digital escape rooms in medical education: Lessons learned from design and pilot implementation
Source: Research Square preprint supplement (doi:10.21203/rs.3.rs-5567145/v1), 2026-01-01
Supplement: Supplementary file 1 [file efdffd08900a2fe6265393f3.docx]

**➊INTERVIEW FORM**

(Post-Pilot Implementation)

1. How would you evaluate the clarity and adequacy of the instructions in the web-based escape room application you participated in?
2. How would you assess the environment, scenes, and puzzles in the web-based escape room application you participated in? Were there any aspects that you think need improvement? If so, what are they?
3. Did the web-based escape room application you participated in motivate you to find solutions? Were there any parts you found boring? How would you evaluate this? What changes do you think are needed?
4. How would you evaluate the web-based escape room application in terms of its usefulness for applying what you have learned?
5. How would you assess the web-based escape room application in terms of identifying areas or topics where your knowledge may be lacking?

**➋THINK-ALOUD PROTOCOL FOR STUDENTS**

I am interested in understanding how you use escape rooms. While performing the tasks and solving the puzzles required in the game system, I would like you to think aloud. My focus will not be on the outcomes of the games or the solutions to the puzzles, but rather on how you think while playing. What you say while playing the escape rooms is very important to me, so I will use a voice recorder to ensure I don't miss anything you say.

- While thinking aloud, please share what you want to do, what you are thinking, and what you are feeling during the escape rooms and puzzles.
- I would also like you to act naturally while playing the escape rooms.
- Please don’t forget to think aloud.
- Are you ready to start the game?

**Note:** If there are pauses, the following prompts will be used:
*"What are you thinking right now?"*
*"Great job with the tasks, keep up the excellent think-aloud process."*

**Tasks**

1. Can you access the website for the escape room at [www.drescaperoom.com](http://www.drescaperoom.com)?
2. Before starting the escape room game, can you review the related instructions?
3. Can you play through an escape room from start to finish?
4. Each escape room consists of five stages, and each stage contains puzzles. Can you express your thoughts while solving the puzzles?
5. I would like you to use the hints. Could you click on the hint icon and share your thoughts about the hints with me?
6. What do you think about the relevance of the escape room and puzzles to what you have learned?
7. Did the escape room and puzzles help you apply and reinforce what you have learned? Can you share your thoughts?
